# Supplementary material
Source: PubMed Central journal article supplement (PMC4748170)
Supplement: NIHMS755630-supplement-support.pdf [file NIHMS755630-supplement-support.pdf]

# **Modulating RNA Alignment Using Directional Dynamic Kinks: Application in Determining an Atomic-Resolution Ensemble for a Hairpin using NMR Residual Dipolar Couplings**

## **Supporting Information**

Loïc Salmon<sup>1</sup>, George M. Giambaşu<sup>2</sup>, Evgenia N. Nikolova<sup>3</sup>, Katja Petzold<sup>4</sup>, Akash Bhattacharya<sup>5</sup>, David A. Case<sup>2</sup>, and Hashim M. Al-Hashimi<sup>6</sup>

<sup>1</sup> Department of Molecular, Cellular, and Developmental Biology and Howard Hughes Medical Institute, University of Michigan, Ann Arbor, Michigan, USA

<sup>2</sup> Department of Chemistry and Chemical Biology, Rutgers University, Piscataway, New Jersey, USA

<sup>3</sup> Department of Integrative Structural and Computational Biology, The Scripps Research Institute, La Jolla, California 92037, United States

<sup>4</sup> Department of Medical Biochemistry and Biophysics, Karolinska Institute, Stockholm, Sweden

<sup>5</sup> The University of Texas Health Science Center, San Antonio Texas, USA

<sup>6</sup> Department of Biochemistry and Chemistry, Duke University School of Medicine, Durham, North Carolina, USA

|    | $S_{xx} (10^{-4})$ | $S_{yy} (10^{-4})$ | $S_{zz} (10^{-4})$ | $\eta$    | $\alpha (^{\circ})$ | $\beta (^{\circ})$ | $\gamma (^{\circ})$ |
|----|--------------------|--------------------|--------------------|-----------|---------------------|--------------------|---------------------|
| C0 | -1.90±0.12         | -2.08±0.19         | 3.98±0.10          | 0.05±0.07 | 100.5±7.8           | -23.1±4.0          | -99.0±17.0          |
| C1 | -4.02±0.11         | -4.15±0.13         | 8.17±0.13          | 0.02±0.02 | 131.7±2.8           | -15.0±1.0          | 169.0±147.2         |
| C2 | -6.02±0.35         | -6.88±0.40         | 12.90±0.07         | 0.07±0.06 | 141.6±4.2           | -20.5±3.5          | -124.9±12.3         |
| C3 | -4.35±0.59         | -6.05±0.30         | 10.40±0.77         | 0.16±0.07 | -19.8±48.5          | -2.3±4.1           | -41.0±67.7          |
| C4 | -5.21±0.48         | -7.89±0.17         | 13.10±0.53         | 0.20±0.04 | 116.5±32.7          | -6.1±1.9           | -166.6±32.9         |
| C5 | -6.71±0.14         | -7.14±0.19         | 13.85±0.18         | 0.03±0.02 | -115.5±14.2         | -2.2±0.6           | 122.1±10.3          |
| C6 | -2.25±0.08         | -5.92±0.07         | 8.17±0.10          | 0.45±0.01 | 178.5±125.6         | -29.1±0.7          | 178.4±125.8         |

Table S1: Order tensor parameters obtained for the different constructs (C0-C6, see Figure 1) obtained by fitting RDCs measured in helical residues to an idealized A-form geometry.

|    | C0   | C1   | C2   | C3   | C4   | C5   | C6   |
|----|------|------|------|------|------|------|------|
| C0 | 1.00 | 0.93 | 0.89 | 0.79 | 0.88 | 0.76 | 0.54 |
| C1 | 0.93 | 1.00 | 0.98 | 0.88 | 0.96 | 0.89 | 0.78 |
| C2 | 0.89 | 0.98 | 1.00 | 0.78 | 0.89 | 0.80 | 0.85 |
| C3 | 0.79 | 0.88 | 0.78 | 1.00 | 0.97 | 0.99 | 0.62 |
| C4 | 0.88 | 0.96 | 0.89 | 0.97 | 1.00 | 0.97 | 0.70 |
| C5 | 0.76 | 0.89 | 0.80 | 0.99 | 0.97 | 1.00 | 0.70 |
| C6 | 0.54 | 0.78 | 0.85 | 0.62 | 0.70 | 0.70 | 1.00 |

Table S2: Scalar products between the different order tensors reported in Table S1. Construct numbering is according to Figure 1.

| Static | $S_{xx} (10^{-4})$ | $S_{yy} (10^{-4})$ | $S_{zz} (10^{-4})$ | Dynamic | $S_{xx} (10^{-4})$ | $S_{yy} (10^{-4})$ | $S_{zz} (10^{-4})$ |
|--------|--------------------|--------------------|--------------------|---------|--------------------|--------------------|--------------------|
| C0     | -1.90              | -2.08              | 3.98               | C0      | -1.67              | -2.54              | 4.21               |
| C1     | -4.02              | -4.15              | 8.17               | C1      | -4.23              | -5.17              | 9.40               |
| C2     | -6.02              | -6.88              | 12.90              | C2      | -6.50              | -7.38              | 13.88              |
| C3     | -4.35              | -6.05              | 10.40              | C3      | -5.29              | -5.94              | 11.28              |
| C4     | -5.21              | -7.89              | 13.10              | C4      | -7.59              | -8.50              | 16.09              |
| C5     | -6.71              | -7.14              | 13.85              | C5      | -6.16              | -7.91              | 14.06              |
| C6     | -2.25              | -5.92              | 8.17               | C6      | -2.78              | -6.61              | 9.39               |

Table S3: Comparison of the order tensors obtained using the static (as in Table S1) and dynamic (during ensemble selection) approach for the different constructs. Construct numbering is according to Figure 1.

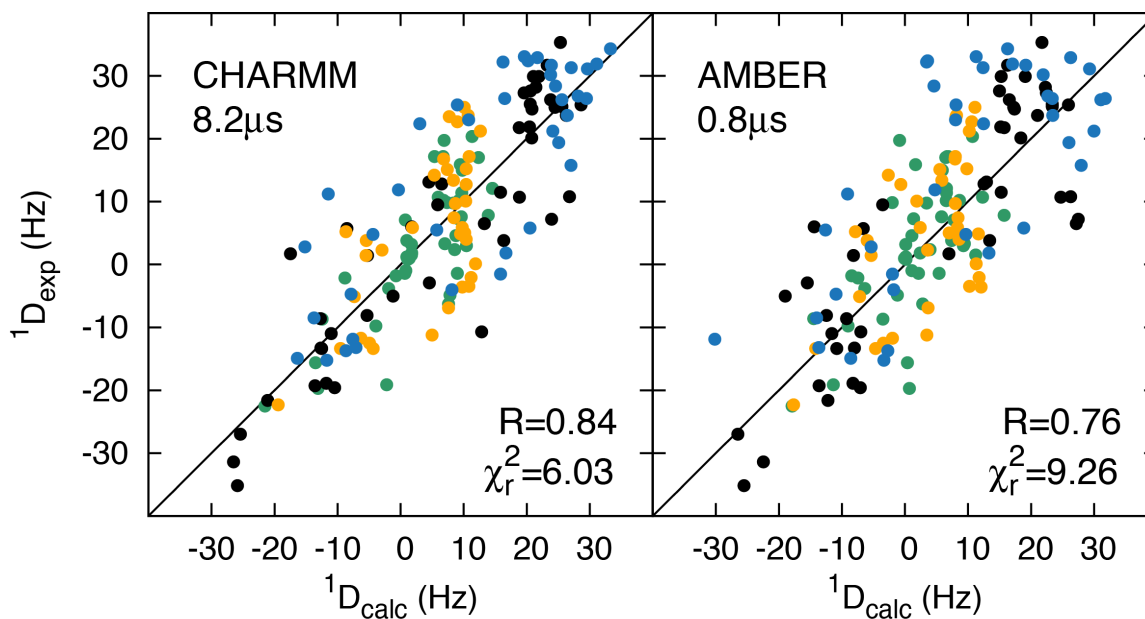

Figure S1: Capability of two different MD trajectories to reproduce experimental RDCs measured in four different HIV-1 TAR constructs reported in the literature<sup>1</sup>. Shown is the data reproduction for (left) an 8.2 $\mu$ s trajectory computed using the CHARMM36 force field and (right) an 0.8 $\mu$ s trajectory computed using the AMBER ff10 force field. The details of the CHARMM trajectory and RDC analysis can be found in ref<sup>1</sup>.

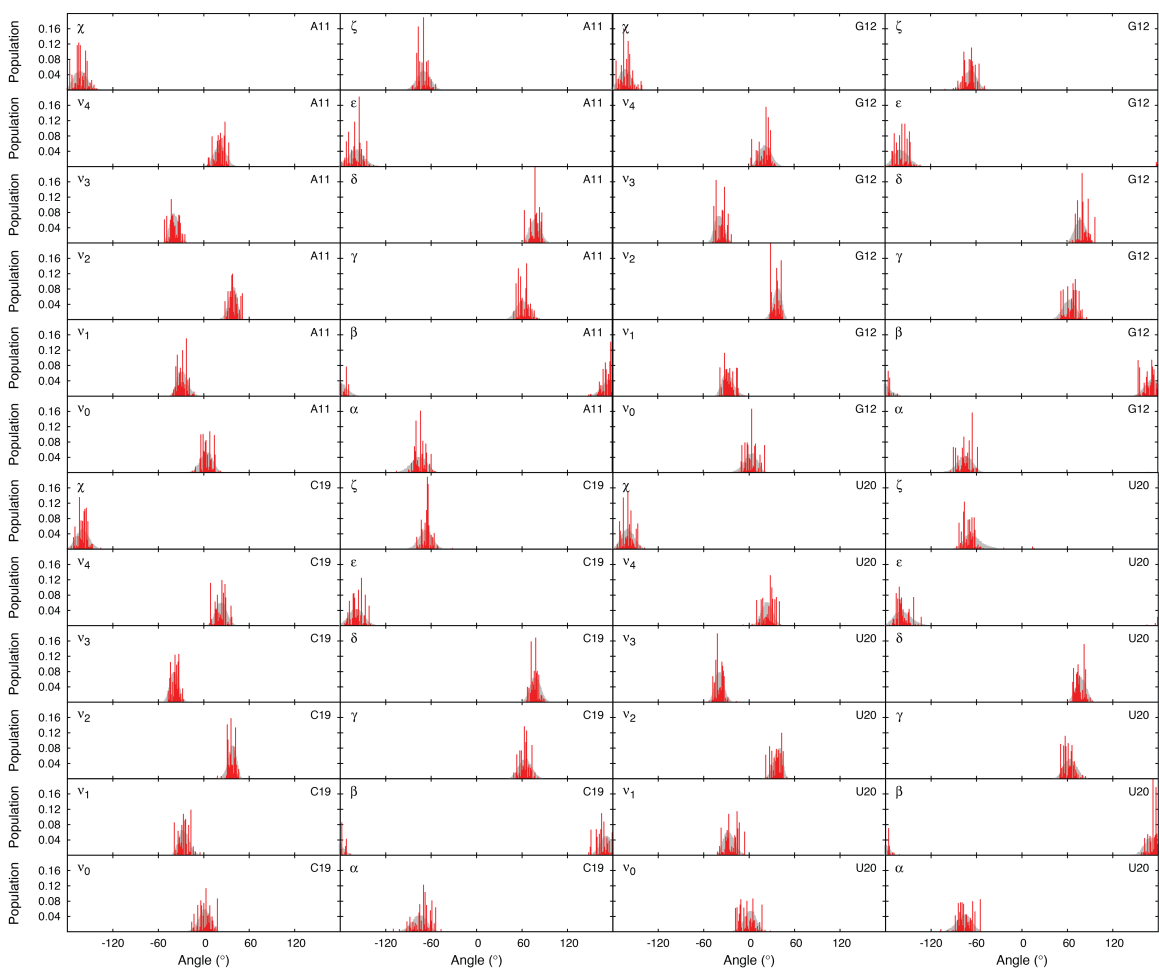

Figure S2: Local dihedral angle distributions for the helical nucleotides. Distribution of local dihedral angle for nucleotides A11, G12, C19 and U20 as observed in the MD pool (grey) and the ensemble selected using the experimental RDCs (red).

|     | avg. | v0     | v1     | v2     | v3     | v4    | $\alpha$ | $\beta$ | $\gamma$ | $\delta$ | $\epsilon$ | $\zeta$ | $\chi$  |
|-----|------|--------|--------|--------|--------|-------|----------|---------|----------|----------|------------|---------|---------|
| A11 | ENS  | 4.41   | -28.33 | 39.78  | -38.94 | 21.86 | -74.01   | 174.87  | 62.19    | 77.88    | -158.76    | -70.71  | -162.07 |
|     | MD   | 3.70   | -27.41 | 38.57  | -38.14 | 22.02 | -76.38   | 176.65  | 61.99    | 77.43    | -157.81    | -69.38  | -161.93 |
| G12 | ENS  | 3.61   | -25.95 | 36.39  | -35.73 | 20.81 | -73.40   | 170.69  | 66.23    | 82.09    | -157.59    | -68.03  | -161.15 |
|     | MD   | 2.72   | -26.47 | 37.90  | -37.99 | 22.61 | -74.83   | 173.96  | 63.94    | 78.00    | -157.91    | -67.33  | -162.43 |
| C13 | ENS  | 1.91   | -26.14 | 38.12  | -38.50 | 23.46 | -76.37   | 170.78  | 65.46    | 78.42    | -152.09    | -60.90  | -160.53 |
|     | MD   | 1.54   | -26.19 | 38.72  | -39.24 | 24.15 | -75.35   | 172.96  | 63.79    | 77.50    | -154.36    | -61.83  | -160.61 |
| U14 | ENS  | 2.49   | -26.88 | 39.06  | -38.59 | 22.98 | -76.53   | 176.01  | 61.13    | 74.75    | -172.74    | -91.08  | -155.73 |
|     | MD   | 0.71   | -24.58 | 36.89  | -38.10 | 23.97 | -74.97   | 173.96  | 63.85    | 75.45    | -173.04    | -93.87  | -153.47 |
| U15 | ENS  | -23.59 | 34.00  | -29.79 | 17.70  | 3.59  | -165.16  | 153.03  | 56.48    | 139.87   | -81.34     | -72.56  | -129.28 |
|     | MD   | -15.34 | 27.96  | -28.51 | 20.80  | -3.83 | -163.70  | 158.81  | 56.55    | 140.85   | -85.72     | -73.86  | -138.58 |
| C16 | ENS  | -21.21 | 36.99  | -37.29 | 25.99  | -3.34 | -72.69   | -176.81 | 59.74    | 149.27   | -91.86     | 76.09   | -132.06 |
|     | MD   | -21.18 | 34.87  | -34.24 | 23.16  | -1.51 | -70.36   | -179.03 | 59.55    | 146.35   | -87.55     | 77.20   | -142.60 |
| G17 | ENS  | -2.34  | -16.81 | 27.78  | -30.18 | 20.98 | 68.90    | -173.22 | 173.34   | 87.70    | -149.33    | -57.87  | 57.01   |
|     | MD   | 1.13   | -15.71 | 22.71  | -23.14 | 14.28 | 67.01    | 179.62  | 174.28   | 95.50    | -124.95    | -49.11  | 64.19   |
| G18 | ENS  | 5.40   | -27.71 | 37.69  | -35.90 | 19.45 | -173.68  | -154.09 | 163.03   | 79.92    | -153.35    | -67.14  | -164.78 |
|     | MD   | 6.94   | -28.76 | 37.72  | -35.05 | 18.17 | -83.87   | 114.02  | 146.96   | 82.24    | -158.49    | -64.04  | -160.67 |
| C19 | ENS  | 2.36   | -25.71 | 37.08  | -37.14 | 22.40 | -70.05   | 169.33  | 64.16    | 76.84    | -156.94    | -65.23  | -159.57 |
|     | MD   | 1.41   | -25.45 | 37.68  | -38.17 | 23.63 | -75.72   | 172.44  | 65.05    | 78.03    | -158.04    | -66.68  | -159.39 |
| U20 | ENS  | -2.24  | -22.46 | 36.54  | -38.81 | 26.42 | -74.09   | 174.68  | 61.36    | 76.55    | -159.65    | -69.57  | -159.76 |
|     | MD   | 1.31   | -25.60 | 37.95  | -38.60 | 23.93 | -76.64   | 171.92  | 64.69    | 78.21    | -156.34    | -63.19  | -159.57 |
|     | var. | v0     | v1     | v2     | v3     | v4    | $\alpha$ | $\beta$ | $\gamma$ | $\delta$ | $\epsilon$ | $\zeta$ | $\chi$  |
| A11 | ENS  | 0.007  | 0.006  | 0.005  | 0.007  | 0.007 | 0.009    | 0.011   | 0.008    | 0.006    | 0.012      | 0.006   | 0.010   |
|     | MD   | 0.010  | 0.007  | 0.004  | 0.005  | 0.008 | 0.023    | 0.015   | 0.017    | 0.007    | 0.015      | 0.011   | 0.012   |
| G12 | ENS  | 0.011  | 0.007  | 0.004  | 0.006  | 0.010 | 0.016    | 0.015   | 0.012    | 0.008    | 0.012      | 0.009   | 0.009   |
|     | MD   | 0.011  | 0.008  | 0.004  | 0.005  | 0.009 | 0.025    | 0.015   | 0.018    | 0.007    | 0.014      | 0.010   | 0.009   |
| C13 | ENS  | 0.005  | 0.003  | 0.002  | 0.003  | 0.004 | 0.012    | 0.011   | 0.005    | 0.006    | 0.013      | 0.008   | 0.010   |
|     | MD   | 0.008  | 0.006  | 0.004  | 0.004  | 0.007 | 0.023    | 0.012   | 0.017    | 0.006    | 0.013      | 0.011   | 0.009   |
| U14 | ENS  | 0.008  | 0.008  | 0.005  | 0.003  | 0.005 | 0.014    | 0.011   | 0.006    | 0.005    | 0.018      | 0.009   | 0.005   |
|     | MD   | 0.009  | 0.008  | 0.005  | 0.005  | 0.007 | 0.023    | 0.010   | 0.017    | 0.007    | 0.013      | 0.013   | 0.013   |
| U15 | ENS  | 0.012  | 0.008  | 0.006  | 0.008  | 0.013 | 0.021    | 0.015   | 0.014    | 0.013    | 0.015      | 0.011   | 0.058   |
|     | MD   | 0.037  | 0.027  | 0.012  | 0.012  | 0.029 | 0.028    | 0.031   | 0.015    | 0.013    | 0.020      | 0.017   | 0.090   |
| C16 | ENS  | 0.008  | 0.005  | 0.003  | 0.004  | 0.008 | 0.021    | 0.012   | 0.016    | 0.004    | 0.012      | 0.010   | 0.048   |
|     | MD   | 0.013  | 0.008  | 0.007  | 0.012  | 0.016 | 0.018    | 0.012   | 0.011    | 0.013    | 0.018      | 0.013   | 0.024   |
| G17 | ENS  | 0.016  | 0.011  | 0.011  | 0.015  | 0.019 | 0.019    | 0.013   | 0.010    | 0.016    | 0.103      | 0.123   | 0.038   |
|     | MD   | 0.026  | 0.012  | 0.012  | 0.026  | 0.036 | 0.029    | 0.018   | 0.021    | 0.029    | 0.193      | 0.248   | 0.048   |
| G18 | ENS  | 0.017  | 0.011  | 0.004  | 0.006  | 0.014 | 0.565    | 0.514   | 0.207    | 0.009    | 0.012      | 0.009   | 0.011   |
|     | MD   | 0.012  | 0.007  | 0.004  | 0.006  | 0.012 | 0.326    | 0.393   | 0.279    | 0.008    | 0.012      | 0.011   | 0.012   |
| C19 | ENS  | 0.011  | 0.008  | 0.004  | 0.003  | 0.009 | 0.019    | 0.017   | 0.006    | 0.004    | 0.010      | 0.006   | 0.006   |
|     | MD   | 0.009  | 0.007  | 0.004  | 0.004  | 0.007 | 0.022    | 0.012   | 0.017    | 0.006    | 0.014      | 0.011   | 0.010   |
| U20 | ENS  | 0.017  | 0.013  | 0.007  | 0.004  | 0.011 | 0.017    | 0.007   | 0.008    | 0.006    | 0.019      | 0.020   | 0.009   |
|     | MD   | 0.009  | 0.007  | 0.005  | 0.004  | 0.007 | 0.026    | 0.013   | 0.019    | 0.006    | 0.021      | 0.032   | 0.010   |

Table S4: Average values and corresponding standard deviations of the different backbone dihedral angles sampled in the cUUCGg loop by the RDC-selected (ENS) and MD-generated (MD) trajectory.

|         | C13  |      | U14  |      | U15  |      | C16  |      | G17  |      | G18  |      |
|---------|------|------|------|------|------|------|------|------|------|------|------|------|
|         | ENS  | MD   |
| O1'exo  | 0.0  | 0.0  | 0.0  | 0.0  | 0.0  | 0.0  | 0.0  | 0.0  | 0.0  | 0.0  | 0.0  | 0.0  |
| C1'endo | 0.0  | 0.0  | 0.0  | 0.0  | 0.0  | 0.1  | 0.0  | 0.0  | 2.2  | 12.4 | 0.0  | 0.2  |
| C2'exo  | 0.9  | 4.7  | 1.9  | 4.2  | 0.0  | 0.0  | 0.0  | 0.0  | 10.9 | 16.0 | 22.3 | 25.8 |
| C3'endo | 98.6 | 91.7 | 90.5 | 89.6 | 0.0  | 0.0  | 0.0  | 0.2  | 64.8 | 46.8 | 68.8 | 71.5 |
| C4'exo  | 0.5  | 3.7  | 7.6  | 6.1  | 0.0  | 0.0  | 0.0  | 0.2  | 22.1 | 22.1 | 8.9  | 2.6  |
| O1'endo | 0.0  | 0.0  | 0.0  | 0.0  | 0.0  | 0.0  | 0.0  | 0.0  | 0.0  | 0.0  | 0.0  | 0.0  |
| C1'exo  | 0.0  | 0.0  | 0.0  | 0.0  | 16.1 | 13.4 | 0.0  | 9.2  | 0.0  | 0.0  | 0.0  | 0.0  |
| C2'endo | 0.0  | 0.0  | 0.0  | 0.0  | 81.3 | 57.7 | 91.7 | 76.0 | 0.0  | 0.0  | 0.0  | 0.0  |
| C3'exo  | 0.0  | 0.0  | 0.0  | 0.0  | 2.1  | 16.7 | 7.8  | 14.1 | 0.0  | 0.0  | 0.0  | 0.0  |
| C4'endo | 0.0  | 0.0  | 0.0  | 0.0  | 0.4  | 10.2 | 0.5  | 0.1  | 0.0  | 0.0  | 0.0  | 0.0  |

Table S5: Population of the different sugar puckers sampled in the cUUCGg loop by the RDC-selected (ENS) and MD-generated (MD) trajectory.

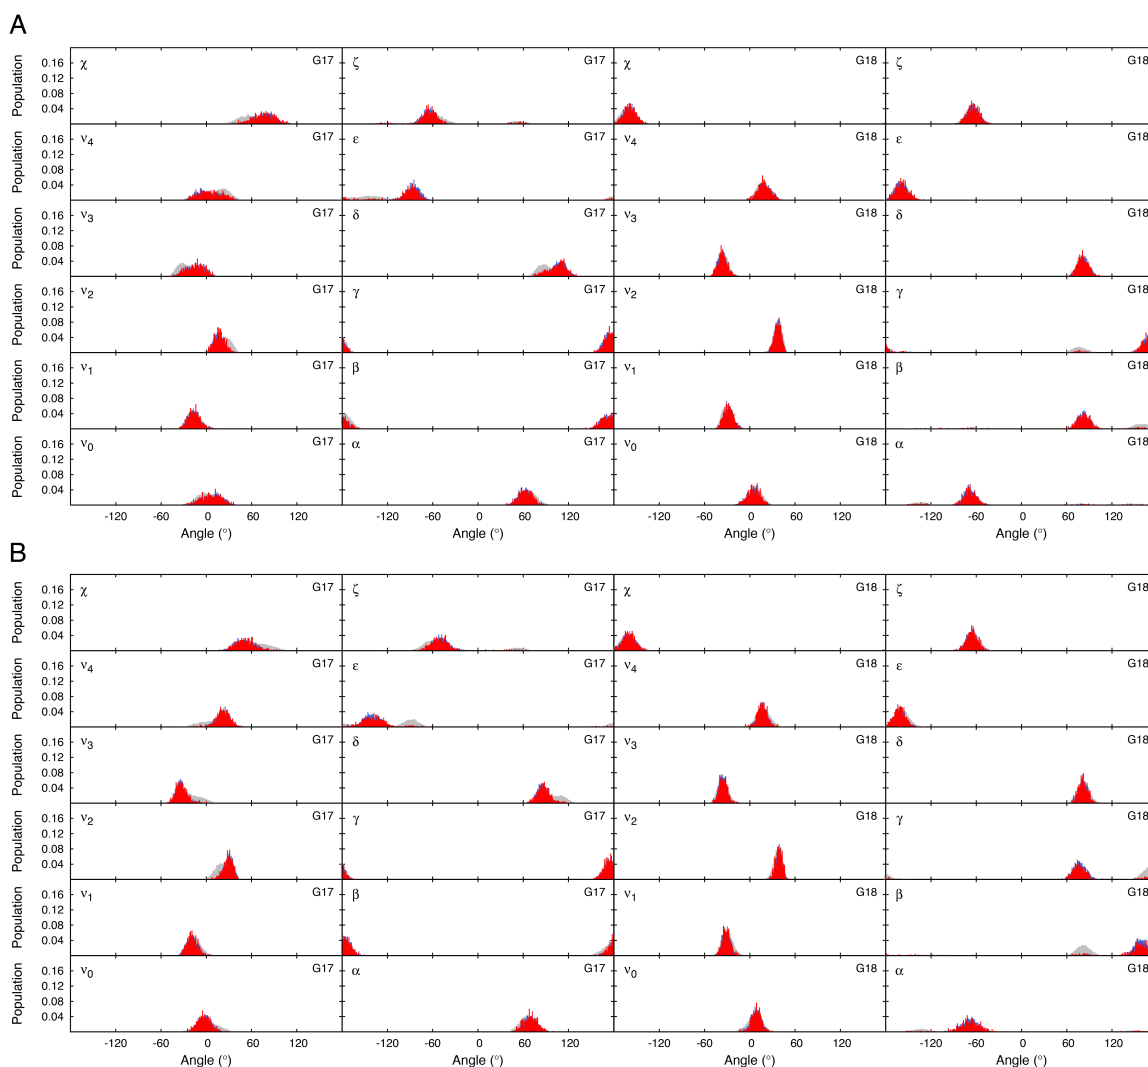

Figure S3: Capturing local dihedral angle dynamics using synthetic RDC data. The synthetic RDCs were used in a selection procedure identical to the one used for the experimental data (see Methods) and the capability of the selection to reproduce the local dihedral angles was investigated (A) Distribution of local dihedral angle for nucleotides 17 and 18 as observed in the MD pool (grey) the synthetic target ensemble 1 (blue) and the ensemble selected using the synthetic data generated from target 1 (red). (B) Distribution of local dihedral angles for nucleotides 17 and 18 as observed in the MD pool (grey) the synthetic target ensemble 2 (blue) and the ensemble selected using the synthetic RDC data generated from target ensemble 2 (red).

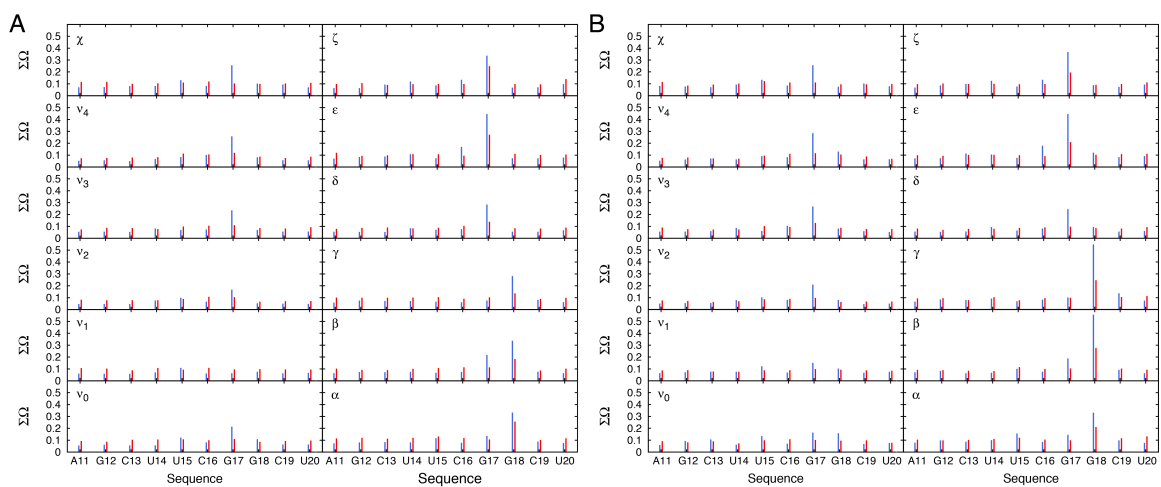

Figure S4: Capturing local dihedral angle dynamics using simulated data as evaluated using REnsemble<sup>2</sup>. Shown as  $\Sigma\Omega$  values comparing backbone dihedral angles between the target and the MD-generated ensemble (blue) and the target and RDC-selected ensemble (red). Data are shown for two different target ensembles (A) target ensemble 1 and (B) target ensemble 2.



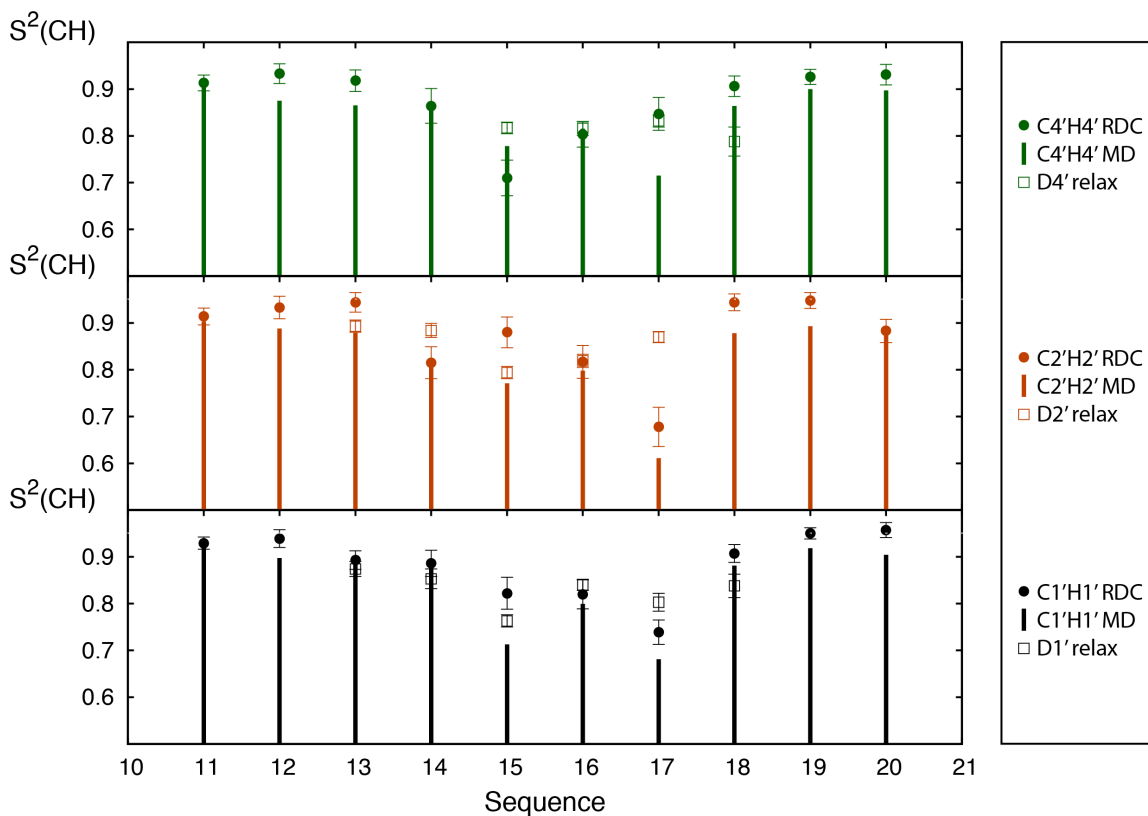

Figure S5: Conformational disorder in the UUCG tetraloop. Comparison of the Lipari-Szabo in relaxation order parameter ( $S^2$ ) for C4'H4' and D4' (green), C2'H2' and D2' (orange) and C1'H1' and D1' (black) obtained using the RDC-selected ensemble (filled circles), MD-generated ensemble (bars), and  $^2\text{H}$  spin relaxation data (open squares), measured in a related UUCG tetraloop<sup>3</sup>. Note that differences in the sequence of bps following the closing bp in the uUUCGg loop used in this study and in the  $^2\text{H}$  relaxation study could contribute to differences for residues 13 and 18. Error bars for the RDC-selected ensemble are obtained using Monte Carlo simulations.

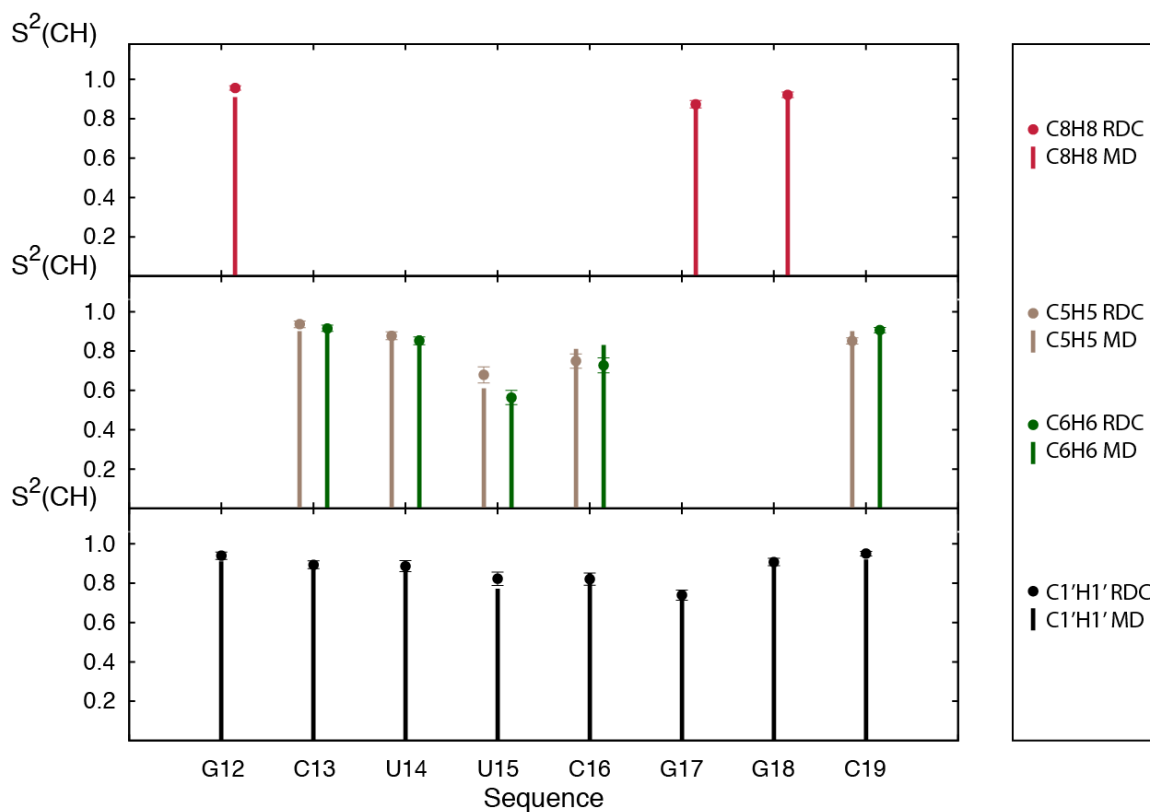

Figure S6: Conformational disorder in the cUUCGg tetraloop. Comparison of the order parameter ( $S^2$ ) of several bond vectors C8H8 (red), C5H5 (brown), C6H6 (green) and C1'H1' (black). Bars correspond to the order parameters computed for a similar tetraloop using the force-field *ff10<sup>t</sup>* and filled circle to the order parameter computed for the RDC-selected ensemble. Error bars for the RDC-selected ensemble are obtained using Monte Carlo simulations (see Methods).

|    | PDB ID | Chain | Start | End | Method | Class    |
|----|--------|-------|-------|-----|--------|----------|
| 1  | 1AUD   | B     | 28    | 35  | NMR    | RNA      |
| 2  | 1BGZ   | A     | 10    | 15  | NMR    | RNA      |
| 3  | 1BYJ   | A     | 11    | 16  | NMR    | RNA      |
| 4  | 1D6K   | B     | 283   | 293 | NMR    | RIBOSOME |
| 5  | 1DK1   | B     | 8     | 13  | X-Ray  | RIBOSOME |
| 6  | 1DK1   | B     | 32    | 37  | X-Ray  | RIBOSOME |
| 7  | 1EBQ   | A     | 12    | 17  | NMR    | RNA      |
| 8  | 1EBR   | A     | 12    | 17  | NMR    | RNA      |
| 9  | 1EBS   | A     | 12    | 17  | NMR    | RNA      |
| 10 | 1F6Z   | A     | 12    | 17  | NMR    | RNA      |
| 11 | 1F79   | A     | 12    | 17  | NMR    | RNA      |
| 12 | 1F7G   | A     | 12    | 17  | NMR    | RNA      |
| 13 | 1F7I   | A     | 12    | 17  | NMR    | RNA      |
| 14 | 1F7Y   | B     | 8     | 13  | X-Ray  | RIBOSOME |
| 15 | 1F7Y   | B     | 32    | 37  | X-Ray  | RIBOSOME |
| 16 | 1FMN   | A     | 16    | 21  | NMR    | RNA      |
| 17 | 1FYO   | A     | 11    | 16  | NMR    | RNA      |
| 18 | 1FYP   | A     | 11    | 16  | NMR    | RNA      |
| 19 | 1G70   | A     | 54    | 64  | NMR    | VIRAL    |
| 20 | 1H06   | A     | 4     | 9   | NMR    | DNA      |
| 21 | 1HOQ   | A     | 4     | 9   | NMR    | DNA      |
| 22 | 1I6U   | C     | 16    | 21  | X-Ray  | RIBOSOME |
| 23 | 1I6U   | D     | 16    | 21  | X-Ray  | RIBOSOME |
| 24 | 1IKD   | A     | 7     | 12  | NMR    | RNA      |
| 25 | 1K2G   | A     | 5     | 10  | NMR    | RNA      |
| 26 | 1KP7   | A     | 14    | 19  | NMR    | RNA      |
| 27 | 1KUQ   | B     | 8     | 13  | X-Ray  | RIBOSOME |
| 28 | 1KUQ   | B     | 32    | 37  | X-Ray  | RIBOSOME |
| 29 | 1M82   | A     | 10    | 15  | NMR    | RNA      |
| 30 | 1MFY   | A     | 14    | 19  | NMR    | RNA      |
| 31 | 1PBR   | A     | 11    | 16  | NMR    | RNA      |
| 32 | 1RAW   | A     | 21    | 26  | NMR    | RNA      |
| 33 | 1TLR   | A     | 10    | 15  | NMR    | RNA      |
| 34 | 1ULL   | A     | 14    | 19  | NMR    | VIRAL    |
| 35 | 1VX8   | A     | 419   | 424 | X-Ray  | RIBOSOME |
| 36 | 1VXI   | A     | 419   | 424 | X-Ray  | RIBOSOME |
| 37 | 1XSG   | A     | 12    | 17  | NMR    | RNA      |
| 38 | 1XSH   | A     | 12    | 17  | NMR    | RNA      |
| 39 | 1XST   | A     | 12    | 17  | NMR    | RNA      |
| 40 | 1XSU   | A     | 12    | 17  | NMR    | RNA      |

|    | PDB ID | Chain | Start | End | Method | Class             |
|----|--------|-------|-------|-----|--------|-------------------|
| 41 | 1Z31   | A     | 270   | 286 | NMR    | RNA               |
| 42 | 1ZHO   | B     | 15    | 20  | X-Ray  | STRUCTURAL        |
| 43 | 1ZHO   | D     | 15    | 20  | X-Ray  | STRUCTURAL        |
| 44 | 1ZHO   | F     | 15    | 20  | X-Ray  | STRUCTURAL        |
| 45 | 1ZHO   | H     | 15    | 20  | X-Ray  | STRUCTURAL        |
| 46 | 2AU4   | A     | 20    | 25  | NMR    | RNA               |
| 47 | 2CD3   | A     | 12    | 17  | NMR    | NUCLEIC           |
| 48 | 2CD6   | A     | 12    | 17  | NMR    | NUCLEIC           |
| 49 | 2GIO   | A     | 13    | 18  | NMR    | RNA               |
| 50 | 2GIP   | A     | 12    | 17  | NMR    | RNA               |
| 51 | 2HEM   | A     | 10    | 15  | NMR    | RNA               |
| 52 | 2HGH   | B     | 32    | 37  | NMR    | TRANSCRIPTION/RNA |
| 53 | 2HUA   | A     | 17    | 22  | NMR    | RNA               |
| 54 | 2HW8   | B     | 15    | 20  | X-Ray  | STRUCTURAL        |
| 55 | 2J00   | A     | 419   | 424 | X-Ray  | RIBOSOME          |
| 56 | 2J02   | A     | 419   | 424 | X-Ray  | RIBOSOME          |
| 57 | 2KHY   | A     | 17    | 22  | NMR    | RNA               |
| 58 | 2KMJ   | A     | 29    | 36  | NMR    | RNA/PEPTIDE       |
| 59 | 2KOC   | A     | 5     | 10  | NMR    | RNA               |
| 60 | 2KTZ   | A     | 19    | 24  | NMR    | RNA               |
| 61 | 2KU0   | A     | 19    | 24  | NMR    | RNA               |
| 62 | 2KZL   | A     | 27    | 32  | NMR    | RNA               |
| 63 | 2L2J   | A     | 19    | 24  | NMR    | RNA               |
| 64 | 2L2K   | A     | 19    | 24  | NMR    | HYDROLASE/RNA     |
| 65 | 2L3E   | A     | 18    | 23  | NMR    | RNA               |
| 66 | 2LHP   | A     | 16    | 21  | NMR    | RNA               |
| 67 | 2LKR   | A     | 63    | 68  | NMR    | RNA               |
| 68 | 2LQZ   | A     | 13    | 18  | NMR    | RNA               |
| 69 | 2LU0   | A     | 28    | 33  | NMR    | RNA               |
| 70 | 2LUB   | A     | 16    | 21  | NMR    | RNA               |
| 71 | 2LUN   | A     | 12    | 17  | NMR    | RNA               |
| 72 | 2LWK   | A     | 15    | 20  | NMR    | RNA               |
| 73 | 2M4Q   | 1     | 11    | 16  | NMR    | RNA/ANTIBIOTIC    |
| 74 | 2M58   | A     | 12    | 17  | NMR    | RNA               |
| 75 | 2UUA   | A     | 419   | 424 | X-Ray  | RIBOSOME          |
| 76 | 2UUB   | A     | 419   | 424 | X-Ray  | RIBOSOME          |
| 77 | 2UXC   | A     | 419   | 424 | X-Ray  | RIBOSOME          |
| 78 | 2VQE   | A     | 419   | 424 | X-Ray  | RIBOSOME          |
| 79 | 2VQF   | A     | 419   | 424 | X-Ray  | RIBOSOME          |
| 80 | 3AM1   | B     | 32    | 37  | X-Ray  | TRANSFERASE/RNA   |

|     | PDB ID | Chain | Start | End  | Method | Class               |
|-----|--------|-------|-------|------|--------|---------------------|
| 81  | 3T1Y   | A     | 414   | 419  | X-Ray  | RIBOSOME/ANTIBIOTIC |
| 82  | 3V2C   | A     | 419   | 424  | X-Ray  | RIBOSOME/INHIBITOR  |
| 83  | 3V2E   | A     | 419   | 424  | X-Ray  | RIBOSOME/INHIBITOR  |
| 84  | 3V7E   | C     | 65    | 70   | X-Ray  | RIBOSOMAL           |
| 85  | 3V7E   | D     | 265   | 270  | X-Ray  | RIBOSOMAL           |
| 86  | 4AY2   | C     | 8     | 13   | X-Ray  | HYDROLASE/RNA       |
| 87  | 4B3M   | A     | 419   | 424  | X-Ray  | RIBOSOME            |
| 88  | 4JF2   | A     | 60    | 65   | X-Ray  | RNA                 |
| 89  | 4JUW   | A     | 419   | 424  | X-Ray  | RIBOSOME            |
| 90  | 4KIY   | A     | 419   | 424  | X-Ray  | RIBOSOME/ANTIBIOTIC |
| 91  | 4KIY   | A     | 1449  | 1454 | X-Ray  | RIBOSOME/ANTIBIOTIC |
| 92  | 4KJ0   | A     | 419   | 424  | X-Ray  | RIBOSOME/ANTIBIOTIC |
| 93  | 4KJ0   | A     | 1449  | 1454 | X-Ray  | RIBOSOME/ANTIBIOTIC |
| 94  | 4KJ2   | A     | 419   | 424  | X-Ray  | RIBOSOME/ANTIBIOTIC |
| 95  | 4KJ2   | A     | 1028  | 1033 | X-Ray  | RIBOSOME/ANTIBIOTIC |
| 96  | 4KJ2   | A     | 1449  | 1454 | X-Ray  | RIBOSOME/ANTIBIOTIC |
| 97  | 4KJ4   | A     | 419   | 424  | X-Ray  | RIBOSOME/ANTIBIOTIC |
| 98  | 4KJ4   | A     | 1449  | 1454 | X-Ray  | RIBOSOME/ANTIBIOTIC |
| 99  | 4KJ6   | A     | 207   | 212  | X-Ray  | RIBOSOME/ANTIBIOTIC |
| 100 | 4KJ6   | A     | 419   | 424  | X-Ray  | RIBOSOME/ANTIBIOTIC |
| 101 | 4KJ6   | A     | 1449  | 1454 | X-Ray  | RIBOSOME/ANTIBIOTIC |
| 102 | 4KJ8   | A     | 419   | 424  | X-Ray  | RIBOSOME/ANTIBIOTIC |
| 103 | 4KJ8   | A     | 1449  | 1454 | X-Ray  | RIBOSOME/ANTIBIOTIC |
| 104 | 4KJA   | A     | 419   | 424  | X-Ray  | RIBOSOME/ANTIBIOTIC |
| 105 | 4KJA   | A     | 1028  | 1033 | X-Ray  | RIBOSOME/ANTIBIOTIC |
| 106 | 4KJA   | A     | 1449  | 1454 | X-Ray  | RIBOSOME/ANTIBIOTIC |
| 107 | 4KJC   | A     | 207   | 212  | X-Ray  | RIBOSOME            |
| 108 | 4KJC   | A     | 419   | 424  | X-Ray  | RIBOSOME            |
| 109 | 4KJC   | A     | 1449  | 1454 | X-Ray  | RIBOSOME            |
| 110 | 4PDB   | I     | 17    | 22   | X-Ray  | RIBOSOMAL           |

Table S6: NMR and X-ray crystallography structures with resolution  $<3\text{\AA}$  containing the cUUCGg tetraloop motif obtained using FRABASE.

## REFERENCES

1. Salmon, L.; Bascom, G.; Andricioaei, I.; Al-Hashimi, H. M. *J. Am. Chem. Soc.*, **2013**, *135*, 5457-5466.
2. Yang, S.; Salmon, L.; Al-Hashimi, H. M. *Nat Methods*, **2014**, *1*, 552-554.
3. Vallurupalli, P.; Kay, L. E. *J. Am. Chem. Soc.* **2005**, *127*, 6893.
4. Giambasu, G. M.; York, D. M.; Case, D. A. *RNA*, **2015**, *21*, 963-974.
